# Supplementary material
Source: MDPI journal article supplement (https://www.mdpi.com/2073-4441/12/12/3389)
Supplement: s1 [file s1]

## Supplementary Material - Tables

**Table S1.** Total microplastics analysis (n = 21). The table reports the obtained density value (mean, median and percentiles) for four seasons and the three sites, for all the sampled MP, and the results of statistical analysis performed through Kruskal Wallis test. In this and the following tables the sites are indicated by their acronyms, the same as those used in the text (San Rossore = SR; Marina di Vecchiano = MV; Viareggio = V).

| SEASON                   | Density values (items/m <sup>2</sup> ) | SITE              |                   |                  | Kruskal Wallis (p-value) |
|--------------------------|----------------------------------------|-------------------|-------------------|------------------|--------------------------|
|                          |                                        | SR                | MV                | V                |                          |
| Spring                   | Mean                                   | 326.4             | 393.6 ±302        | 179.6 ±126.4     | 0.122                    |
|                          | Median                                 | ±311.6            | 317.32            | 228.66           |                          |
|                          | Q3; Q1                                 | 305.3             | (529,33; 219,66)  | (252,66; 131,33) |                          |
|                          |                                        | (351,31; 291)     |                   |                  |                          |
| Summer                   | Mean                                   | 942.4             | 163.6 ±107.2      | 115.2 ±79.6      | 0.084                    |
|                          | mediana                                | ±1130.4           | 9.32              | 158              |                          |
|                          | Q3; Q1                                 | 286               | (197; 138,22)     | (164,32; 87,76)  |                          |
|                          |                                        | (1356,33; 200)    |                   |                  |                          |
| Autumn                   | Mean                                   | 2080.8±242        | 944.8 ±1716       | 202.8 ± 167.6    | 0.060                    |
|                          | Median                                 | 8,4               | 310               | 210              |                          |
|                          | Q3; Q1                                 | 321.32            | (1370,67; 201,34) | (292,33; 117,1)  |                          |
|                          |                                        | (3045,66; 236,34) |                   |                  |                          |
| Winter                   | Mean                                   | 485.2             | 383.2 ±618        | 204 ±132.4       | 0.449                    |
|                          | Median                                 | ±464.8            | 362.68            | 282.64           |                          |
|                          | Q3; Q1                                 | 488               | (527,32; 228,66)  | (303,97; 143,32) |                          |
|                          |                                        | (554,7; 417,32)   |                   |                  |                          |
| Kruskal Wallis (p-value) |                                        | 0.295             | 0.100             | 0.177            |                          |
|                          | Mean value for site                    | 958.7±792.0       | 471.3 ± 333,0     | 175.4 ± 42,0     |                          |
|                          | Total mean value                       |                   | 535.13 ± 389.0    |                  |                          |

**Table S2.** Analysis by type of plastic (n = 21). The three S2-tables (S2-FR, S2-RP and S2-EPS) reports the obtained density value (mean, median and percentiles) for four seasons and the three sites, for each one of the three types of samples MP, and the results of statistical analysis performed through Kruskal Wallis test. In red the significant p-value of Kruskall-Wallis test.

Table S2 – FR (FRAGMENTS)

| SEASON                   | Density values (items/m <sup>2</sup> ) | SITE            |                |                 | Kruskal Wallis (p-value) |
|--------------------------|----------------------------------------|-----------------|----------------|-----------------|--------------------------|
|                          |                                        | SR              | MV             | V               |                          |
| Spring                   | Mean                                   | 132.4 ± 119.2   | 40.08 ± 38.8   | 92.04 ± 58      | 0.008                    |
|                          | Median                                 | 157.32          | 36.7           | 76.6            |                          |
|                          | Q3; Q1                                 | (192,33; 68,34) | (45,68; 33,68) | (105,33; 71,33) |                          |
|                          |                                        |                 |                |                 |                          |
| Summer                   | Mean                                   | 38.00 ± 37.2    | 32.04 ± 21.2   | 56.8 ± 42.4     | 0.049                    |
|                          | Median                                 | 28.0            | 34.0           | 66.7            |                          |
|                          | Q3; Q1                                 | (59,1; 17,99)   | (36,66; 28)    | (68,66; 44,99)  |                          |
|                          |                                        |                 |                |                 |                          |
| Autumn                   | Mean                                   | 50.04 ± 22      | 30.08 ± 30     | 124.8 ± 110.8   | <0.001                   |
|                          | Median                                 | 42.68           | 24.66          | 152.66          |                          |
|                          | Q3; Q1                                 | (72,68; 36,68)  | (42; 16,67)    | (162,33; 5,1)   |                          |
|                          |                                        |                 |                |                 |                          |
| Winter                   | Mean                                   | 115.6 ± 90.4    | 35.6 ± 38      | 108.4 ± 74      | 0.025                    |
|                          | Median                                 | 88              | 36             | 124             |                          |
|                          | Q3; Q1                                 | (150,66; 33,66) | (45,66; 18,66) | (148,68; 67)    |                          |
|                          |                                        |                 |                |                 |                          |
| Kruskal Wallis (p-value) |                                        | 0.150           | 0.686          | 0.049           |                          |
|                          | Mean value for site                    | 84.1 ± 67,0     | 34.45 ± 32,0   | 95.51 ± 71,0    |                          |
|                          | Total mean value                       | 71.35 ± 56.70   |                |                 |                          |

Table S2 – RP (RESIN PELLETS)

| SEASON | Density values (items/m <sup>2</sup> ) | SITE            |                |                | Kruskal Wallis (p-value) |
|--------|----------------------------------------|-----------------|----------------|----------------|--------------------------|
|        |                                        | SR              | MV             | V              |                          |
| Spring | Mean                                   | 92.4 ± 77,2     | 105.6 ± 86,4   | 76.6 ± 71,6    | 0.509                    |
|        | Median                                 | 94.68           | 26.4 ± 21.6    | 49.32          |                          |
|        | Q3; Q1                                 | (112,67; 75,67) | (131,63; 64,3) | (96,99; 42,76) |                          |
|        |                                        |                 |                |                |                          |
| Summer | Mean                                   | 95.2 ± 84,8     | 59.6 ± 36,4    | 46.8 ± 40,4    | 0.487                    |
|        | Median                                 | 64.66           | 52.66          | 44.66          |                          |
|        | Q3; Q1                                 | (134,34; 40,1)  | (66,66; 49,33) | (56,33; 35,33) |                          |
|        |                                        |                 |                |                |                          |
| Autumn | Mean                                   | 107.2 ± 101,2   |                | 70 ± 58        | 0.674                    |
|        | Median                                 | 96              | 103.2 ± 120,9  | 90.66          |                          |

|                                 |                           |                                            |                                     |                                      |          |
|---------------------------------|---------------------------|--------------------------------------------|-------------------------------------|--------------------------------------|----------|
|                                 | Q3; Q1                    | (121,68;<br>67,32)                         | 38<br>(103,2; 120,9)                | (96,33; 54)                          |          |
| Winter                          | Mean<br>Median<br>Q3; Q1  | 162.8±134<br>153.32<br>(219,32;<br>101,32) | 120.8±147.2<br>52<br>(120,8; 147,2) | 94.4±61,6<br>97.32<br>(122, 68; 110) | KW 0.516 |
| Kruskal<br>Wallis<br>(p-value)) | K-W                       | 0.584                                      | 0.520                               | 0.465                                |          |
|                                 | Mean<br>value<br>for site | 114.4 ±99,0                                | 97.3 ± 97,7                         | 72 ±58                               |          |
|                                 | Total<br>mean<br>value    |                                            | 94.56 ± 84.90                       |                                      |          |

Table S2 – EPS (EXPANDED POLYSTIRENE)

| SEASON                         | Density<br>values<br>(items/<br>m²) | EPS                                         |                                        |                                 | Kruskal<br>Wallis<br>(p-value) |
|--------------------------------|-------------------------------------|---------------------------------------------|----------------------------------------|---------------------------------|--------------------------------|
|                                |                                     | SR                                          | MV                                     | V                               |                                |
| Spring                         | Mean<br>Median<br>Q3; Q1            | 101.6±107<br>114.68<br>(154,67;<br>58,67)   | 247.2±228<br>216.7<br>(336,68; 142,25) | 11.2±16.4<br>8<br>(16,5; 8)     | <0.001                         |
| Summer                         | Mean<br>Median<br>Q3; Q1            | 808.8±105<br>744<br>(1229,67;15<br>7,32)    | 71.6±63.6<br>60<br>(79,58; 33)         | 5.6±9.2<br>3.34<br>(8,67; 1,67) | <0.001                         |
| Autumn                         | Mean<br>Median<br>Q3; Q1            | 1923.8±23<br>1650.66<br>(2951,1;<br>509,34) | 810.4±1604,8<br>230<br>(1178,67; 152)  | 8±15.2<br>2.68<br>(10,67; 5,1)  | <0.001                         |
| Winter                         | Mean<br>Median<br>Q3; Q1            | 207.2±293<br>156<br>(37,34;<br>81,34)       | 230.8±489.2<br>17.32<br>(345,32; 9,32) | 1.2±2.8<br>1.32<br>(2; 1, 66)   | 0.042                          |
| Kruskal<br>Wallis<br>(p-value) |                                     | 0.044                                       | 0.038                                  | 0.127                           |                                |
|                                | Mean<br>value<br>for site           | 760.3 ±<br>836.0                            | 340 ±323.4                             | 6.5 ± 4.2                       |                                |
|                                | Total<br>mean<br>value              |                                             | 368.83 ± 387.86                        |                                 |                                |

**Table S3. Zonal Analysis (n = 21).** The three S3 tables (S3-FR, S3-RP and S3-EPS) reports, for the sampled MP all together, the obtained density value (mean, median and percentiles) for the three sites

and the three zone selected, and the results of statistical analysis performed through Kruskal Wallis test. In red the significant p-value of Kruskal-Wallis test.

Table S3 – FR (FRAGMENTS)

| SITE                        | Density values<br>(items/<br>m <sup>2</sup> ) | FRAGMENTS     |                 |                | Kruskal Wallis<br>(p-value) |
|-----------------------------|-----------------------------------------------|---------------|-----------------|----------------|-----------------------------|
|                             |                                               | D             | I               | S              |                             |
| SR                          | Mean                                          | 112±68        | 78 ±66          | 49.2±608.3     | 0.046                       |
|                             | Median                                        | 82.68         | 42.68           | 33.32          |                             |
|                             | Q3-Q1                                         | (16.7; 51)    | (8.7; 33.3)     | (4.3; 11.3)    |                             |
|                             |                                               |               |                 |                |                             |
| MV                          | Mean                                          | 52.4±15,2     | 32.4±13,6       | 17.6±16        | 0.008                       |
|                             | Median                                        | 49.32         | 36              | 12             |                             |
|                             | Q3-Q1                                         | (63,32; 42)   | (40,66; 23, 34) | (22,8; 68)     |                             |
|                             |                                               |               |                 |                |                             |
| V                           | Mean                                          | 129.6±47,6    | 104.8±84        | 46.8±25,6      | 0.014                       |
|                             | Median                                        | 125.3         | 89.32           | 40             |                             |
|                             | Q3-Q1                                         | (158; 79, 32) | (114,66; 56,66) | (56,66; 33,34) |                             |
|                             |                                               |               |                 |                |                             |
| Kruskal Wallis<br>(p-value) |                                               | 0.013         | 0.069           | 0.073          |                             |

Table S3 – RP (RESIN PELLETS)

| SITE                        | Density values<br>(items/<br>m <sup>2</sup> ) | PELLETS          |             |             | Kruskal Wallis<br>(p-value) |
|-----------------------------|-----------------------------------------------|------------------|-------------|-------------|-----------------------------|
|                             |                                               | D                | I           | S           |                             |
| SR                          | Mean                                          | 179.2±77.6       | 100.8±45.6  | 42.4±34.4   | 0.003                       |
|                             | Median                                        | 160              | 86.68       | 44          |                             |
|                             | Q3-Q1                                         | (29; 64.3)       | (18; 38.3)  | (3.3; 16.3) |                             |
|                             |                                               |                  |             |             |                             |
| MV                          | Mean                                          | 188.8±106.4      | 52.8±20.8   | 40.8±20.8   | 0.002                       |
|                             | Median                                        | 169.32           | 49.32       | 45.32       |                             |
|                             | Q3-Q1                                         | (259,34; 104,66) | (52; 42)    | (52,66; 36) |                             |
|                             |                                               |                  |             |             |                             |
| V                           | Mean                                          | 111.1±36.8       | 70±38.4     | 30±22.4     | 0.002                       |
|                             | Median                                        | 108              | 61.32       | 30.68       |                             |
|                             | Q3-Q1                                         | (18.3; 36.7)     | (9.3; 24.3) | (2.7; 14)   |                             |
|                             |                                               |                  |             |             |                             |
| Kruskal Wallis<br>(p-value) |                                               | 0.176            | 0.080       | 0.579       |                             |

| (p-value))                           |                           |                      |                 |                 |                          |
|--------------------------------------|---------------------------|----------------------|-----------------|-----------------|--------------------------|
| Table S3– EPS (EXPANDED POLYSTIRENE) |                           |                      |                 |                 |                          |
| SITE                                 | Density values (items/m²) | EXPANDED POLYSTIRENE |                 |                 | Kruskal Wallis (p-value) |
|                                      |                           | D                    | I               | S               |                          |
| SR                                   |                           | 1453.6±1604          |                 |                 | 0.03                     |
|                                      | Mean                      | .4                   | 928.4±1226.8    | 135.6±173.6     |                          |
|                                      | Median                    | 994.68               | 156             | 53.32           |                          |
|                                      | Q3-Q1                     | (1892; 311,34)       | (1398,66; 86)   | (175,34; 23,34) |                          |
| MV                                   |                           | 862.4±1457.          |                 |                 | 0.015                    |
|                                      | Mean                      | 2                    | 146.4±148.4     | 58±44           |                          |
|                                      | Median                    | 420                  | 69.32           | 46.68           |                          |
|                                      | Q3-Q1                     | (583,32; 124,68)     | (216,68; 40,66) | (90; 28,66)     |                          |
| V                                    |                           |                      |                 |                 | 0.248                    |
|                                      | Mean                      | 8.8±10               | 10.4±11.6       | 3.2±4.4         |                          |
|                                      | Median                    | 2.68                 | 4               | 2.68            |                          |
|                                      | Q3-Q1                     | (14; 1.32)           | (15,34; 2,68)   | (3,34; 0)       |                          |
| Kruskal Wallis (p-value)             |                           | 0.001                | 0.001           | 0.005           |                          |

**Table S4.** Abundance of FR and EPS belonging to the different size classes in the four seasons. Data expressed as N°tot fragments collected for each site, with standard deviation D obtained by averaging on the 2 temporal replicas. In winter only one sample was taken, so D is not available. Sp = spring; Su = summer; Au = autumn; Wi = winter.

| SITE             | SEASON | FR        |        |        |        | EPS    |        |        |        |
|------------------|--------|-----------|--------|--------|--------|--------|--------|--------|--------|
|                  |        | 1–2<br>mm | 2–3 mm | 3–4 mm | 4–5 mm | 1–2 mm | 2–3 mm | 3–4 mm | 4–5 mm |
| SR               | Sp     | 24.5      | 63     | 77.5   | 133.5  | 18     | 6.5    | 81.5   | 65.0   |
|                  |        | ±18.5     | ±29.5  | ±47.2  | ±57.0  | ±12.5  | ±68.5  | ±37.5  | ±45.0  |
|                  | Su     | 2.5       | 9      | 16.5   | 56.0   | 241    | 899    | 353    | 196    |
|                  |        | ±2.5      | ±2.8   | ±3.5   | ±17.0  | ±198.0 | ±723.5 | ±263.5 | ±158.5 |
|                  | Au     | 5.0       | 16.5   | 1,5    | 67.0   | 760    | 1529   | 1361   | 682.5  |
|                  |        | ±7.0      | ±6.4   | ±3.5   | ±5.5   | ±696.0 | ±1042  | ±587.0 | ±246.5 |
|                  | Wi     | 8         | 35     | 53     | 161    | 61     | 163    | 148    | 64     |
| Yearly<br>values | 16.1   | 30.9      | 37.1   | 104.4  | 270    | 649.4  | 485.9  | 251.9  |        |
|                  |        | ±9.3      | ±12.9  | ±18.1  | ±26.5  | ±302.2 | ±611.3 | ±296   | ±150   |
| MV               | Sp     | 2.5       | 17     | 18.5   | 50.5   | 81.5   | 134    | 184    | 127    |
|                  |        | ±3.5      | ±17    | ±16.2  | ±17.7  | ±27.5  | ±98.5  | ±34.0  | ±14.5  |
|                  | Su     | 4         | 8.5    | 8.5    | 51.5   | 16     | 36     | 59.5   | 47     |
|                  |        | ±1,4      | ±5     | ±0.7   | ±10.6  | ±4.0   | ±5.5   | ±18.0  | ±9.5   |

|   |               |             |               |               |                 |                 |               |                 |                 |
|---|---------------|-------------|---------------|---------------|-----------------|-----------------|---------------|-----------------|-----------------|
| V | Au            | 0.5<br>±0.7 | 6<br>±8.4     | 8.5<br>±10.6  | 33.5<br>±41.7   | 697.5<br>±959.5 | 560<br>±727.0 | 347.5<br>±436.0 | 218.5<br>±252.5 |
|   | Wi            | 10          | 18            | 88            | 0               | 149             | 185           | 126             | 59              |
|   | Yearly values | 4.2<br>±1.9 | 12.4<br>±10.1 | 30.9<br>±9.2  | 33.9<br>±23.3   | 236<br>±330.3   | 228.7<br>±277 | 179.2<br>±162.7 | 112.9<br>±92.2  |
|   | Sp            | 14<br>±10   | 27<br>±10     | 35.5<br>±12.4 | 130.5<br>±33.2  | 2<br>±1.5       | 6.5<br>±5.0   | 4.5<br>±2.0     | 12.0<br>±4.5    |
|   | Su            | 1.5<br>±0.7 | 8<br>±5.6     | 30<br>±4.2    | 99.5<br>±95.4   | 0               | 2.5<br>±1.0   | 3.0<br>±2.5     | 4.5<br>±2.0     |
|   | Au            | 5<br>±5.6   | 24<br>±14.1   | 42.5<br>±30.4 | 209.5<br>±119.5 | 0               | 1.5<br>±2.0   | 7.5<br>±10.5    | 8.5<br>±9.0     |
|   | Wi            | 5           | 21            | 43            | 175             | 1               | 2             | 0               | 0               |
|   | Yearly values | 6.4<br>±5.4 | 20<br>±9.9    | 37.7<br>±15.7 | 153.6<br>±82.7  | 0.7<br>±0.5     | 3.1<br>±2.7   | 3.7<br>±5       | 6.2<br>±5.2     |

**Table S5.** Seasonal and yearly abundance of resin (RP) divided into different colorimetric classes, for each beach. The data are expressed as the number of total items collected for each beach (through nine sample square of 0.25 m<sup>2</sup> each one). Reported values are obtained by averaging over all temporal replicas. Only one sample was taken in the winter season. Sp = spring; Su = summer; Au = autumn; Wi = winter.

| SITE | SEASON             | RESIN PELLETS (RP) |              |            |            |
|------|--------------------|--------------------|--------------|------------|------------|
|      |                    | COL                | WH           | AM         | TR-GL      |
| SR   | Sp                 | 44.5 ± 29          | 120.5 ± 39   | 5.5 ± 5    | 20 ± 8.5   |
|      | Su                 | 29.5 ± 19.1        | 104.5 ± 10.6 | 13 ± 4.2   | 0          |
|      | Au                 | 35.5 ± 22.6        | 190 ± 41.7   | 17 ± 4.2   | 12 ± 5     |
|      | Wi                 | 42                 | 271          | 27         | 29         |
|      | Yearly values      | 37.9 ± 17.7        | 171.5 ± 22.8 | 15.6 ± 3.5 | 15.4 ± 3.4 |
|      | Yearly values in % | 16                 | 71           | 7          | 6          |
| MV   | Sp                 | 46.5 ± 9.2         | 161.5 ± 14.9 | 18.5 ± 6.4 | 1.5 ± 0.7  |
|      | Su                 | 29.5 ± 19.1        | 104.5 ± 10.6 | 13 ± 4.2   | 0          |
|      | Au                 | 48 ± 27            | 164 ± 77.8   | 19.5 ± 6.4 | 0.5 ± 0.7  |
|      | Wi                 | 51                 | 256          | 23         | 15         |
|      | Yearly values      | 43.7 ± 13.8        | 171.5 ± 25.8 | 18.5 ± 4.3 | 4.2 ± 0.4  |
|      | Yearly values in % | 18                 | 72           | 8          | 2          |
| V    | Sp                 | 59 ± 29.6          | 89.5 ± 6.4   | 12.5 ± 3.5 | 9 ± 8.5    |
|      | Su                 | 29 ± 19.8          | 64 ± 28.3    | 8.5 ± 5    | 3.5 ± 5    |
|      | Au                 | 52 ± 3.5           | 101.5 ± 35.3 | 9 ± 4.2    | 6.5 ± 7.1  |
|      | Wi                 | 73                 | 115          | 19         | 5          |
|      | Yearly values      | 53.2 ± 13.2        | 92.5 ± 17.5  | 12.2 ± 3.2 | 6.0 ± 5.15 |
|      | Yearly values in % | 32                 | 56           | 7          | 4          |

**Table S6. a.** Seasonal abundance of fragments (FR) divided into different colorimetric classes, for each beach. The data are expressed as the number of total fragments collected for each beach (through nine sample square of 0.25 m<sup>2</sup> each one). Reported values are obtained by averaging over temporal replicas. Only one sample was taken in the winter season. Sp = spring; Su = summer; Au = autumn; Wi = winter.

| SITE | SEASON | FRAGMENTS (FR) |
|------|--------|----------------|
|------|--------|----------------|

|    |                    | TR-GL        | AM          | WH-GL         | WH-OD         | BL            | GR           | RE           | YE          | GY           | BK           | OT          |
|----|--------------------|--------------|-------------|---------------|---------------|---------------|--------------|--------------|-------------|--------------|--------------|-------------|
| SR | Sp                 | 12<br>±15.5  | 16<br>±10   | 86<br>±65     | 35.57<br>±7   | 59.0<br>±11.5 | 19.5<br>±3.5 | 13.5<br>±2.5 | 7.0<br>±1.5 | 10<br>±3     | 12<br>±2.5   | 3.5<br>±0.5 |
|    | Su                 | 5<br>±4.5    | 4.5<br>±5   | 43.52±<br>1.5 | 10<br>±0.6    | 16.5<br>±3    | 5<br>±0.8    | 3.5<br>±0.5  | 2<br>±0.5   | 2.5<br>±1.5  | 3.0<br>±0.5  | 1.5<br>±0.5 |
|    | Au                 | 5.5<br>±2    | 5.5<br>±3.5 | 24<br>±4.5    | 18.5<br>±9.7  | 30<br>±15.5   | 9<br>±4.8    | 7<br>±3.5    | 3.5<br>±2   | 5.0<br>±2.5  | 6<br>±3.5    | 1.5<br>±1   |
|    | Wi                 | 21           | 4           | 83            | 48            | 67            | 15           | 9            | 5           | 6            | 5            | 3           |
|    | Yearly values      | 10.9<br>±5.5 | 7.7<br>±4.6 | 59.1<br>±17.7 | 28<br>±4.3    | 43.2<br>±7.5  | 12.2<br>±7.2 | 8.5<br>±1.6  | 4.2<br>±1.0 | 6.1<br>±1.8  | 6.7<br>±1.6  | 2.4<br>±0.5 |
|    | Yearly values in % | 5.8          | 4.1         | 31.5          | 14.9          | 22.9          | 6.5          | 4.5          | 2.3         | 3.3          | 3.6          | 1.3         |
|    | Sp                 | 2<br>±2.5    | 2<br>±1.5   | 36<br>±26.5   | 10.5<br>±7.1  | 17.5<br>±11.5 | 5.3<br>±3.5  | 4<br>±2.5    | 2<br>±1.3   | 3<br>±2      | 3.5<br>±2.5  | 1.0<br>±0.5 |
| MV | Su                 | 0.5<br>±0.5  | 6<br>±3     | 28<br>±7      | 15<br>±8.5    | 0             | 2            | 0            | 0           | 0            | 0            | 0           |
|    | Au                 | 3.5<br>±3.5  | 3<br>±1.5   | 27.5<br>±8    | 8<br>±4.5     | 12.8<br>±7.9  | 3.9<br>±2.4  | 2.5<br>±1.8  | 1.5<br>±0.9 | 2.0<br>±1.5  | 2.5<br>±1.5  | 0.5<br>±0.5 |
|    | Wi                 | 7            | 4           | 28            | 19            | 25            | 12           | 6            | 3           | 6            | 4            | 2           |
|    | Yearly values      | 3.2<br>±1.6  | 3.7<br>±1.5 | 29.7<br>±10.4 | 13.2<br>±5.0  | 13.5<br>±4.9  | 5.7<br>±1.5  | 3.2<br>±1.1  | 1.5<br>±0.6 | 2.7<br>±0.9  | 2.5<br>±1.0  | 0.9<br>±0.3 |
|    | Yearly values in % | 3.9          | 4.5         | 35.9          | 15.8          | 16.1          | 7.0          | 3.8          | 1.9         | 3.3          | 3.0          | 1.1         |
|    | Sp                 | 2<br>±29.6   | 6<br>±3     | 66<br>±12     | 27.5<br>±13.0 | 44.8<br>±21.2 | 13.7<br>±6.5 | 10.0<br>±4.5 | 5.0<br>±2.4 | 7.5<br>±3.5  | 9<br>±4.5    | 2.5<br>±1.5 |
|    | Su                 | 29<br>±19.8  | 4<br>±3     | 59<br>±52.5   | 15.0<br>±12.6 | 24.7<br>±20.6 | 7.5<br>±6.3  | 5.5<br>±4.5  | 2.5<br>±2.3 | 4.0<br>±3.5  | 4.5<br>±4.0  | 1.5<br>±1.5 |
| V  | Au                 | 52<br>±3.5   | 4.5<br>±1.5 | 93.5<br>±54.5 | 38<br>±23.7   | 62.1<br>±38.9 | 19<br>±11.9  | 13.5<br>±8.5 | 7<br>±4.3   | 10.5<br>±7.0 | 12.0<br>±7.6 | 3.5<br>±2.5 |
|    | Wi                 | 73           | 8           | 92            | 30            | 49            | 22           | 11           | 5           | 7            | 11           | 4           |
|    | Yearly values      | 8<br>±13.6   | 5.5<br>±1.9 | 77.5<br>±29.8 | 26.7<br>±12.3 | 44.9<br>±25.5 | 15.7<br>±6.2 | 9.9<br>±4.4  | 5<br>±2.8   | 7.2<br>±3.5  | 9.1<br>±4.0  | 2.9<br>±1.4 |
|    | Yearly values in % | 3.7          | 2.6         | 36.5          | 13.1          | 21.2          | 7.3          | 4.7          | 2.3         | 3.4          | 4.3          | 1.3         |
|    | Sp                 | 2<br>±29.6   | 6<br>±3     | 66<br>±12     | 27.5<br>±13.0 | 44.8<br>±21.2 | 13.7<br>±6.5 | 10.0<br>±4.5 | 5.0<br>±2.4 | 7.5<br>±3.5  | 9<br>±4.5    | 2.5<br>±1.5 |
|    | Su                 | 29<br>±19.8  | 4<br>±3     | 59<br>±52.5   | 15.0<br>±12.6 | 24.7<br>±20.6 | 7.5<br>±6.3  | 5.5<br>±4.5  | 2.5<br>±2.3 | 4.0<br>±3.5  | 4.5<br>±4.0  | 1.5<br>±1.5 |
|    | Au                 | 52<br>±3.5   | 4.5<br>±1.5 | 93.5<br>±54.5 | 38<br>±23.7   | 62.1<br>±38.9 | 19<br>±11.9  | 13.5<br>±8.5 | 7<br>±4.3   | 10.5<br>±7.0 | 12.0<br>±7.6 | 3.5<br>±2.5 |

**Table S6. b.** Percentage abundance of fragments (FR) divided into different colorimetric classes, for each beach, for the total sample and for the selected representative subsample for which we have the polymer characterization. The data are obtained calculating the number of total fragments collected yearly for each beach (through nine sample square of 0,25 m<sup>2</sup> each one), averaged over the seasonal replicas, and reporting them as percentage (Yearly values in %).

| SITE | SAMPLE | FRAGMENTS (FR) |     |       |       |      |     |     |     |     |     |     |
|------|--------|----------------|-----|-------|-------|------|-----|-----|-----|-----|-----|-----|
|      |        | TR-GL          | A M | WH-GL | WH-OD | BL   | GR  | RE  | YE  | GY  | BK  | OT  |
| SR   | TOTAL  | 5.8            | 4.1 | 31.5  | 14.9  | 22.9 | 6.5 | 4.5 | 2.3 | 3.3 | 3.6 | 1.3 |

|    |       |     |     |      |      |      |      |     |     |     |     |     |
|----|-------|-----|-----|------|------|------|------|-----|-----|-----|-----|-----|
| MV | SUB   | 5.3 | 7.6 | 28.2 | 15.3 | 22.9 | 9.9  | 7.2 | 2.6 | 0.2 | 1.2 | 0.8 |
|    | TOTAL | 3.9 | 4.5 | 35.9 | 15.8 | 16.1 | 7.0  | 3.8 | 1.9 | 3.3 | 3.0 | 1.1 |
| V  | SUB   | 5.6 | 4.6 | 31.1 | 14.8 | 19.4 | 12.2 | 6.5 | 4.4 | 0   | 0   | 4.1 |
|    | TOTAL | 3.7 | 2.6 | 36.5 | 13.1 | 21.2 | 7.3  | 4.7 | 2.3 | 3.4 | 4.3 | 1.3 |
|    | SUB   | 7.2 | 8.8 | 27.1 | 11.6 | 15   | 11.9 | 8.5 | 5.2 | 0   | 0.5 | 6.6 |

**Table S7.** Main polymers detected in fragments (FR) and resin pellets (RP) for the items analyzed by infrared spectroscopy (sub-sample). The total numerical values of EPS fragments collected is 6849. Sampling dates are 12/14/2016 and 5/29/2017. Sp = spring; Au = autumn.

| SITE | SEASON | FR  |     |     |              | RP  |     |     |              |
|------|--------|-----|-----|-----|--------------|-----|-----|-----|--------------|
|      |        | PE* | PP  | PS* | OTHER**<br>* | PE* | PP  | PS* | OTHER**<br>* |
| SR   | Sp     | 104 | 38  | 0   | 25           | 129 | 48  | 6   | 0            |
|      | Au     | 73  | 37  | 0   | 10           | 144 | 17  | 0   | 0            |
| MV   | Sp     | 82  | 38  | 0   | 2            | 162 | 41  | 0   | 0            |
|      | Au     | 33  | 12  | 4   | 9            | 173 | 35  | 5   | 0            |
| V    | Sp     | 96  | 34  | 0   | 28           | 114 | 34  | 0   | 0            |
|      | Au     | 138 | 44  | 5   | 13           | 136 | 21  | 7   | 0            |
| TOT  |        | 526 | 203 | 9   | 87           | 858 | 254 | 18  | 0            |

\* No distinction was made between HDPE (high density polyethylene) and LDPE (low density polyethylene). \*\* Polystyrene is understood in this paragraph and in the results reported in the table in Appendix B as a fragment, at real density.\*\*\* "Other" includes epoxy resin, EthylenVinyl Acetate (EVA), and dyestuffs.



**Table S8\_a.** Number of fragments (FR) of different polymeric type for each dimensional category (as absolut value and as value normalized within dimensional category). Dim 1 include fragments with major linear dimension between 1cm and 2 cm; Dim 2 between 2 cm and 3 cm; Dim 3 between 3 cm and 4 cm and Dim 4 between 4 cm and 5 cm.

| SIZE  | Number of fragments |         |    |         |    |         |        |            |
|-------|---------------------|---------|----|---------|----|---------|--------|------------|
|       | PE                  | PE *nor | PP | PP *nor | PS | PS *nor | OTHE R | OTHER *nor |
| Dim 1 | 3                   | 0.06    | 33 | 0.33    | 0  | 0       | 18     | 0.33       |
| Dim 2 | 143                 | 0.64    | 62 | 0.08    | 0  | 0       | 17     | 0.08       |
| Dim 3 | 172                 | 0.68    | 57 | 0.09    | 4  | 0.02    | 24     | 0.09       |
| Dim 4 | 208                 | 0.71    | 51 | 0.09    | 5  | 0.02    | 28     | 0.09       |

\*nor It means normalized.

**Table S8. b.** Number of fragments (FR) of different color classes for each dimensional category (as absolut value and as value normalized within dimensional category). Dim 1 include fragments with major linear dimension between 1cm and 2 cm; Dim 2 between 2 cm and 3 cm; Dim 3 between 3 cm and 4 cm and Dim 4 between 4 cm and 5 cm.

| SIZE  | Number of fragments |               |    |            |       |               |       |               |    |            |    |            |    |            |    |            |    |            |    |            |    |           |
|-------|---------------------|---------------|----|------------|-------|---------------|-------|---------------|----|------------|----|------------|----|------------|----|------------|----|------------|----|------------|----|-----------|
|       | TR-GL               | TR-GL<br>*nor | AM | AM<br>*nor | WH-GL | WH-GL<br>*nor | WH-OD | WH-OD<br>*nor | BL | BL<br>*nor | GR | GR<br>*nor | RE | RE<br>*nor | YE | YE<br>*nor | GY | GY<br>*nor | BK | BK<br>*nor | OT | OT<br>nor |
| Dim 1 | 3                   | 0.06          | 4  | 0.08       | 13    | 0.25          | 4     | 0.08          | 8  | 0.15       | 10 | 0.02       | 5  | 0.1        | 2  | 0.04       | 0  | 0          | 1  | 0.02       | 2  | 0.04      |
| Dim 2 | 11                  | 0.05          | 15 | 0.07       | 59    | 0.26          | 33    | 0.15          | 35 | 0.16       | 27 | 0.12       | 16 | 0.1        | 10 | 0.04       | 0  | 0          | 4  | 0.02       | 12 | 0.05      |
| Dim 3 | 21                  | 0.08          | 23 | 0.09       | 58    | 0.22          | 35    | 0.14          | 39 | 0.15       | 23 | 0.09       | 22 | 0.09       | 13 | 0.04       | 0  | 0          | 3  | 0.01       | 9  | 0.03      |
| Dim 4 | 19                  | 0.07          | 16 | 0.06       | 86    | 0.29          | 45    | 0.15          | 56 | 0.19       | 34 | 0.12       | 16 | 0.06       | 13 | 0.04       | 0  | 0          | 2  | 0.01       | 9  | 0.03      |

\*nor It means normalized.

**Table S9.** The table shows, for Polyethylene, the molecular vibrations,  $\delta$  = bending,  $\nu$  = stretching,  $\rho$  = rocking,  $\tau$  = twisting,  $\omega$  = wagging, while the abbreviations in the peaks concern the intensity m = medium, s = strong, vs= very strong, w= weak, vw= very weak. The results show that 357 out of 526 (67%) PE samples had a spectrum very similar to that of the reference sample, where no further bands were found. The only differences concern the intensity of the individual peaks. In contrast, 21 fragments (4% PE samples) have bands similar to titanium oxides (TiO<sub>2</sub>) generally found in white samples, while 80 fragments (15% PE samples) have the characteristic bands of blue phthalocyanine and 54 fragments (10% PE samples) of green phthalocyanine. The phthalocyanines in fact are very resistant dyes, often used for the staining of MPs. The spectra are reported in Figure S5, S6, S7 and S8.

| Raman shift (cm <sup>-1</sup> ) | Molecular group vibrations                          |
|---------------------------------|-----------------------------------------------------|
| 2880vs                          | $\nu$ CH <sub>2</sub> asym                          |
| 2847s                           | $\nu$ CH <sub>2</sub> sym                           |
| 1459w                           | $\delta$ CH <sub>2</sub>                            |
| 1438m                           | $\delta$ CH <sub>2</sub>                            |
| 1415w                           | $\delta$ CH <sub>2</sub> , $\omega$ CH <sub>2</sub> |
| 1293m                           | $\nu$ CC, $\tau$ CH <sub>2</sub>                    |
| 1167vw                          | $\nu$ CC                                            |
| 1127m                           | $\nu$ CC sym.                                       |
| 1060m                           | $\nu$ CC asym.                                      |

**Table S10.** The table shows, for Polypropylene, the molecular vibrations,  $\delta$  = bending,  $\nu$  = stretching,  $\rho$  = rocking,  $\tau$  = twisting,  $\omega$  = wagging, while the abbreviations in the peaks concern the intensity m = medium, s = strong, vs= very strong, w= weak, vw= very weak. The results show that a total of 136 fragments out of 203 (66%) PP samples have a spectrum traceable to the PP reference. The only differences concern the intensity of the individual peaks. In contrast, 5 fragments (2.5% PP samples) show bands of titanium oxides (TiO<sub>2</sub>) generally found in white samples, while 42 fragments (21% PP samples) show the presence of blue phthalocyanine and 17 fragments (8% PP samples) of green phthalocyanine. The spectra are shown in Figures S9, S10, S11 and S12.

| Raman shift (cm <sup>-1</sup> ) | Molecular group vibrations |
|---------------------------------|----------------------------|
| 2952m                           | vCH3 asym.                 |
| 2905m                           | vCH                        |
| 2883s                           | vCH3 sym.                  |
| 2871w                           | vCH2 sym                   |
| 2840m                           | vCH2 sym                   |
| 1458vs                          | δCH3 asym., δCH2           |
| 1435w                           | δCH3 asym.                 |
| 1371m                           | δCH3 sym., ωCH2, δCH, vCC  |
| 1360s                           | δCH3 sym., δCH             |
| 1330                            | δCH, τCH2                  |
| 1306                            | ωCH2, τCH2                 |
| 1296                            | ωCH2, δCH, τCH2            |
| 1257                            | δCH, τCH2, ρCH3            |
| 1219s                           | τCH2, δCH,, vCC            |
| 1167sh                          | vCC ρCH3, δCH              |
| 1152vs                          | vCC vC-CH3, δCH, ρCH3      |
| 1102w                           | vCC, ρCH3, ωCH2, τCH       |
| 1040s                           | vC-CH3, vCC, δCH           |
| 998m                            | ρCH3, δCH, ωCH2            |
| 973s                            | ρCH3, vCC                  |
| 941m                            | ρCH3 vCC                   |
| 900m                            | ρCH3, ρCH2, δCH            |
| 841vs                           | ρCH2, vCC, vC-CH3, ρCH3    |
| 809vs                           | ρCH2, vCC, vC-CH3          |
| 530m                            | ρCH2, vC-CH3, ρCH2         |
| 458m                            | ωCH2                       |
| 398s                            | ωCH2, δCH                  |
| 321m                            | ωCH2                       |
| 252m                            | ωCH2, δCH                  |

**Table S11.** The table shows, for Polystyrene, the molecular vibrations, δ = bending, v = stretching, ρ = rocking, τ = twisting, ω = wagging, while the abbreviations in the peaks concern the intensity m = medium, s = strong, vs= very strong, w= weak, vw= very weak. Excluding expanded polystyrene (EPS), whose polymeric identification was already certain, nine polystyrene compounds were identified within the fragments (FR), out of a total of 816 analysed. The Spectra is reported in Figure S13.

| Raman shift (cm <sup>-1</sup> ) | Molecular group vibrations                                                               |
|---------------------------------|------------------------------------------------------------------------------------------|
| 3053vs                          | vCH.                                                                                     |
| 2900m                           | vCH3, vCH.asym                                                                           |
| 2849w                           | vCH                                                                                      |
| 1602vs                          | v-ring skeletal                                                                          |
| 1583w                           | vC=C                                                                                     |
| 1450w                           | δCH2                                                                                     |
| 1196m                           | vCC, vC-O.                                                                               |
| 1182m                           | vCC, vC-O.                                                                               |
| 1153m                           | vCC, vC-O.                                                                               |
| 1031s                           |  τCH2 |
| 1001vs                          | vCC aromatic ring                                                                        |
| 793m                            | C-H out of plane                                                                         |

|      |                         |
|------|-------------------------|
| 621m | v-ring deformation, vCH |
|------|-------------------------|

**Table S12.** The table shows, for Ethylene, the molecular vibrations,  $\delta$  = bending,  $\nu$  = stretching,  $\rho$  = rocking,  $\tau$  = twisting,  $\omega$  = wagging, while the abbreviations in the peaks concern the intensity m = medium, s = strong, vs= very strong, w= weak, vw= very weak. In the analysis made, 3 fragments traceable to this polymer were identified. The Spectra is reported in Figure S14.

| Raman shift (cm <sup>-1</sup> ) | Molecular group vibrations |
|---------------------------------|----------------------------|
| 2880s                           | vCH.                       |
| 2846vs                          | vCH <sub>2</sub> ,         |
| 1438m                           | $\delta$ CH                |
| 1290m                           | $\tau$ CH <sub>2</sub>     |
| 1130vw                          | $\delta$ CC asym           |
| 1060w                           | $\delta$ CC asym           |

**Table S13.** The table shows, for Ethylene Vinyl Acetate (EVA), the molecular vibrations,  $\delta$  = bending,  $\nu$  = stretching,  $\rho$  = rocking,  $\tau$  = twisting,  $\omega$  = wagging, while the abbreviations in the peaks concern the intensity m = medium, s = strong, vs= very strong, w= weak, vw= very weak. The Spectra is reported in Figure S15.

| Raman shift (cm <sup>-1</sup> ) | Molecular group vibrations |
|---------------------------------|----------------------------|
| 2883vs                          | vCH <sub>x</sub>           |
| 2847vs                          | vCH <sub>2</sub> , vCH     |
| 1738w                           | $\nu$ C=O                  |
| 1438m                           | $\delta$ CH <sub>x</sub>   |
| 1290m                           | $\delta$ CH                |
| 1126vw                          | $\nu$ C-C asym             |
| 1061w                           | $\nu$ C-C asym             |
| 628                             | $\delta$ OCO               |

**Table S14.** The table shows, for Epoxy Resin, the molecular vibrations,  $\delta$  = bending,  $\nu$  = stretching,  $\rho$  = rocking,  $\tau$  = twisting,  $\omega$  = wagging, while the abbreviations in the peaks concern the intensity m = medium, s = strong, vs= very strong, w= weak, vw= very weak. The main bands were allocated with reference to the literature, in particular Vašková et al. [122]. The Spectra is reported in Figure S16.

| Raman shift (cm <sup>-1</sup> ) | Molecular group vibrations |
|---------------------------------|----------------------------|
| 1608vs                          | backbone vibration         |
| 1252vw                          | epoxide vibration band     |
| 1186w                           | backbone vibration         |
| 1112vw                          | backbone vibration         |
| 916w                            | epoxy ring deformation     |

## Supplementary Material - Figures

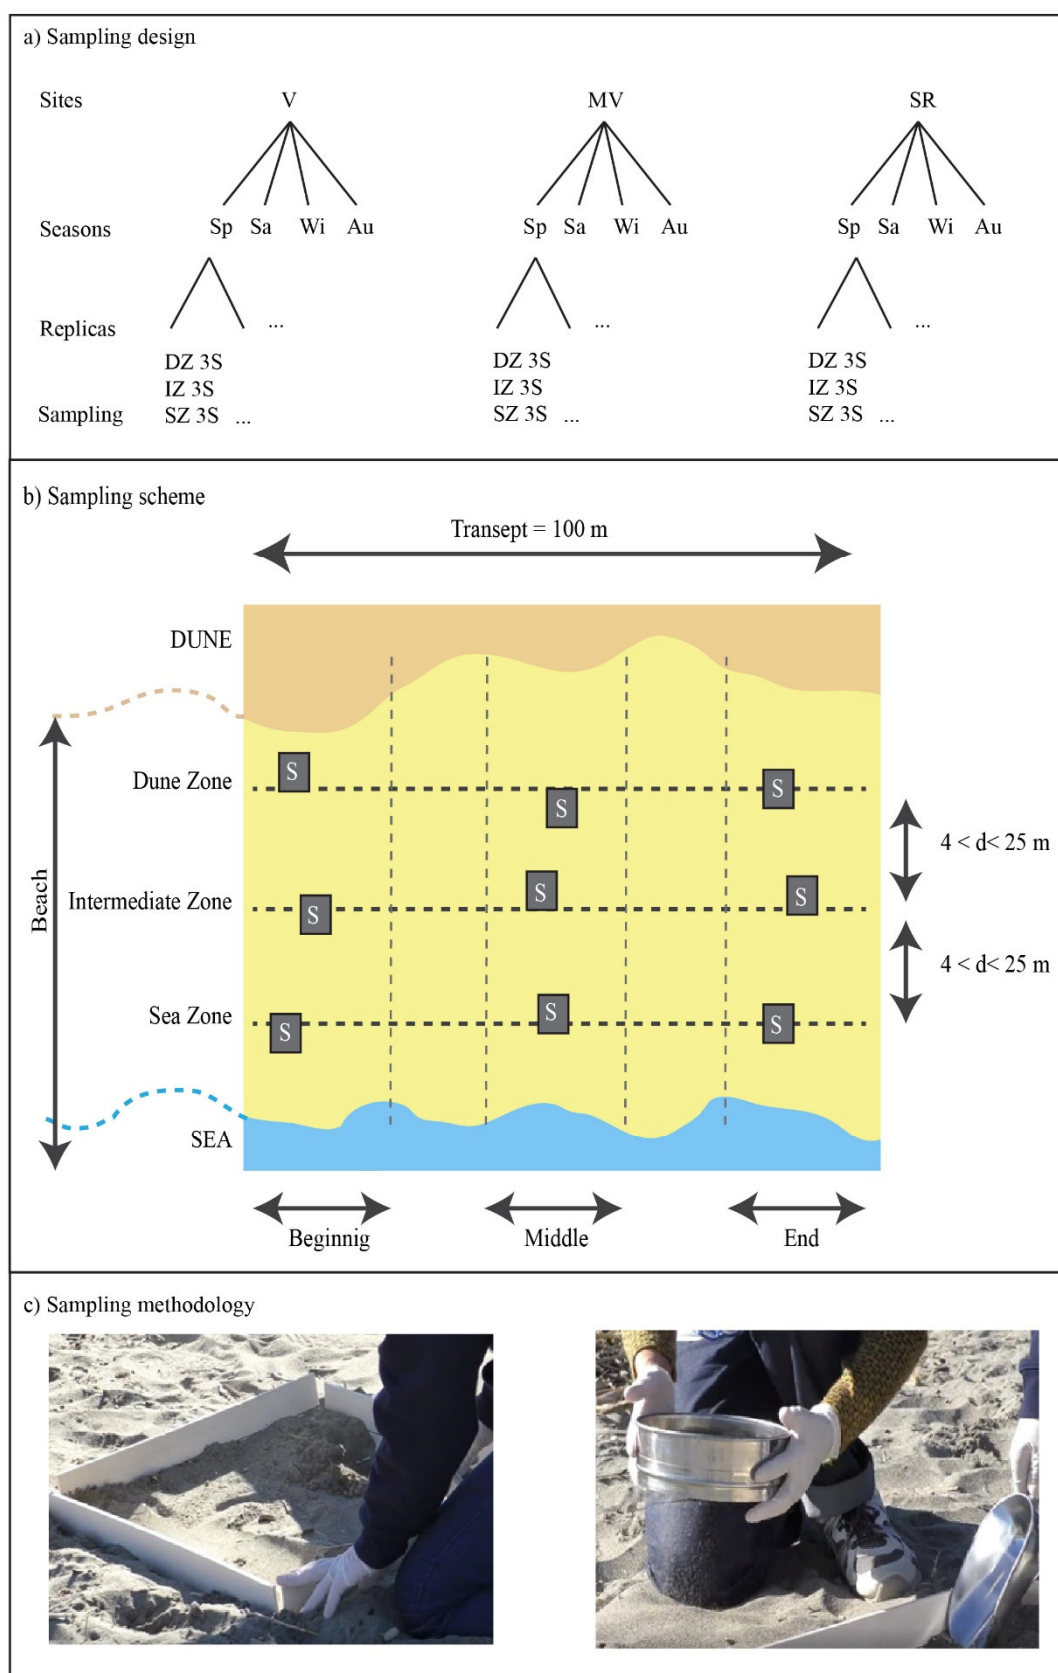

**Figure S1.** The sampling design is multifactorial, where the site factor is crossed (orthogonal) with the seasonality, and the Zone factor is hierarchical. The dates of the sampling are: 7/25/2016, 8/25/2016, 10/31/2016; 12/14/2016; 2/16/2017; 5/29/2017; 6/21/2017.

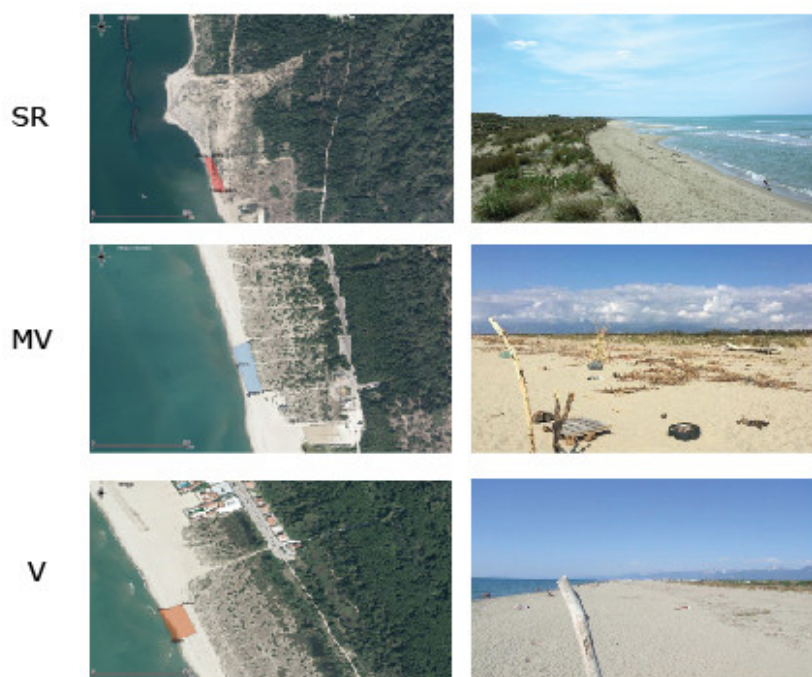

**Figure S2.** Beaches images. SR is San Rossore beach; MV is Marina di Vecchiano beach; V is Viareggio beach. Colored polygons on the left are the monitored stretch of beach. GPS coordinates of the 4 polygon' summit are: for SR 10.278038E, 43.714856N; 10.278176E, 10.278176N; 10.278436E, 43.713871N; 10.278577E, 43.713872N. For MV 10.264421E, 43.795011N; 10.264751E, 43.795694N; 10.264742E, 43.794168N; 10.265135E, 43.794242N. For V 10.244156E, 43.845173N; 10.244828E, 43.845338N; 10.244575E, 43.844218N; 10.278577E, 43.713872N.

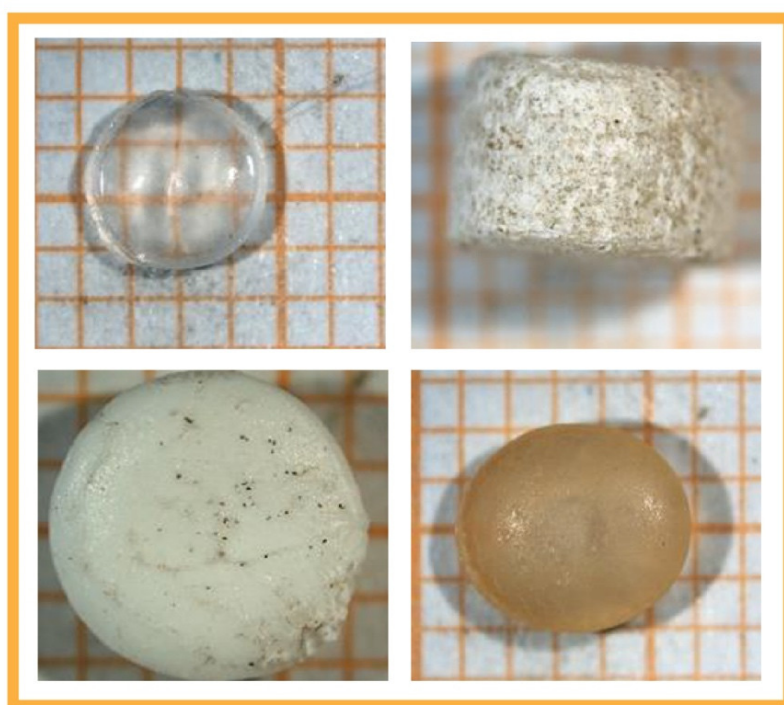

**Figure S3.** A few other examples of the RP type of the sampled MP, with the different colour shades due to ageing, from Transparent-Glossy (TR-GL), to White (WH), and then Amber (AM). Most of them have a round shape, but some also have other shapes, including the cylindrical one.

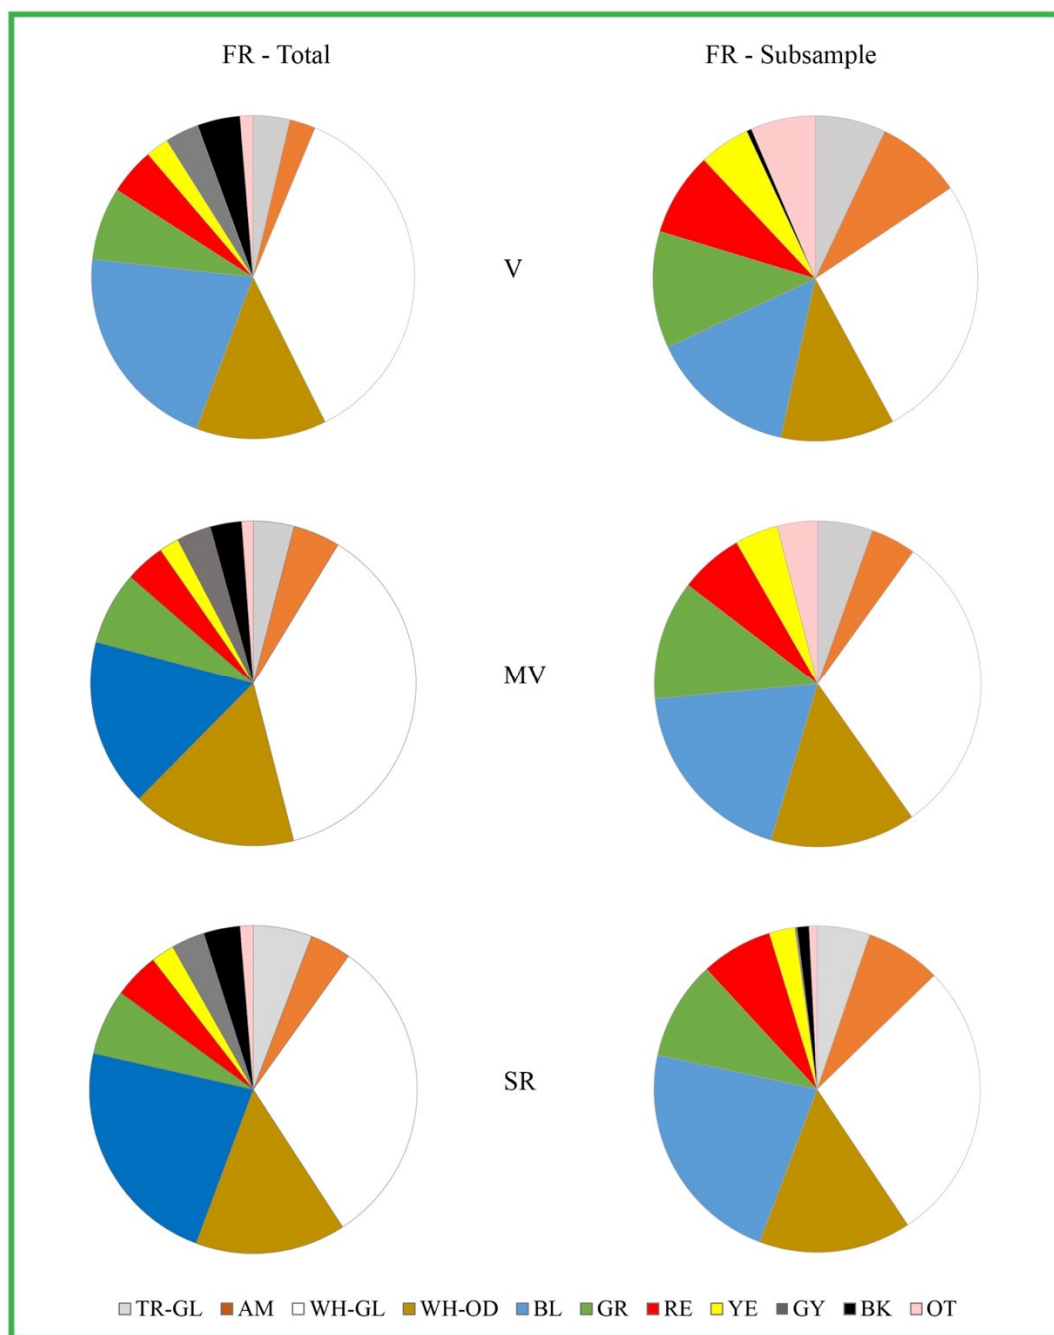

**Figure S4.** Frequencies of color classes for the three sites. At the left for the all FR (total sample) and at the right for the sub-sample of FR with polymeric characterization. Frequencies are very similar (Table S6\_b for values), a part the low presence of black fragments in the sub-sample. Blue and green fragments are the most abundant amongst the colored ones.



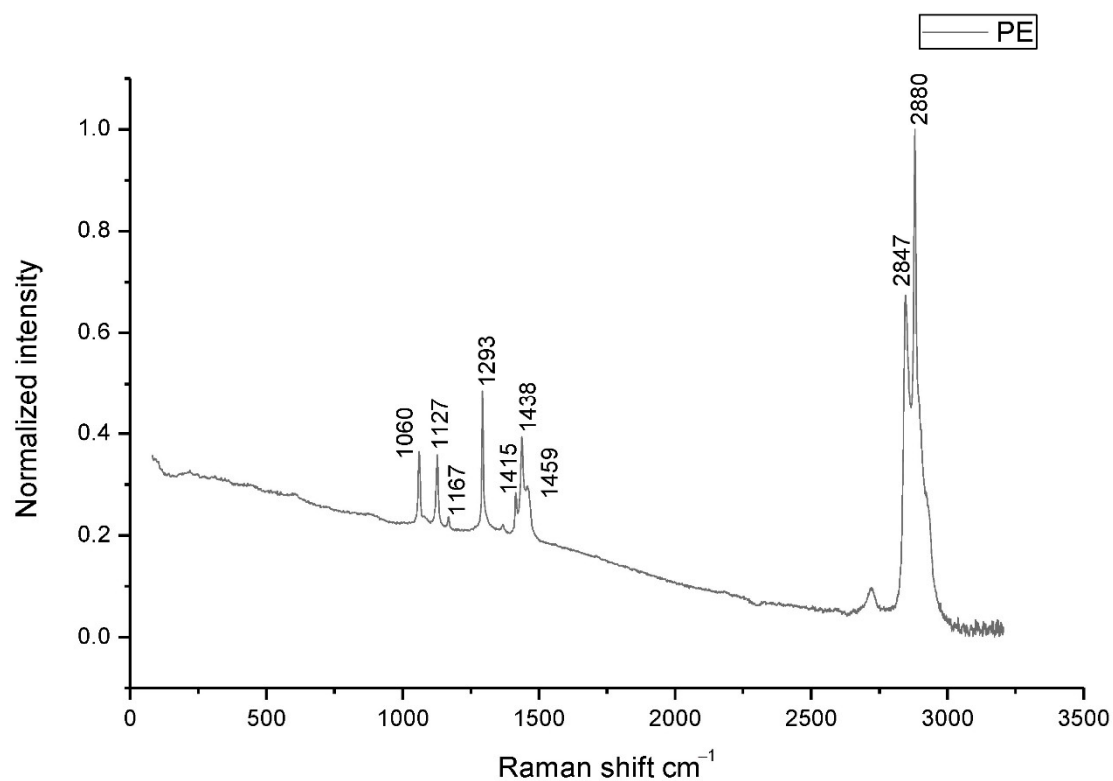

Figure S5. Raman spectrum from a fragment of polyethylene.

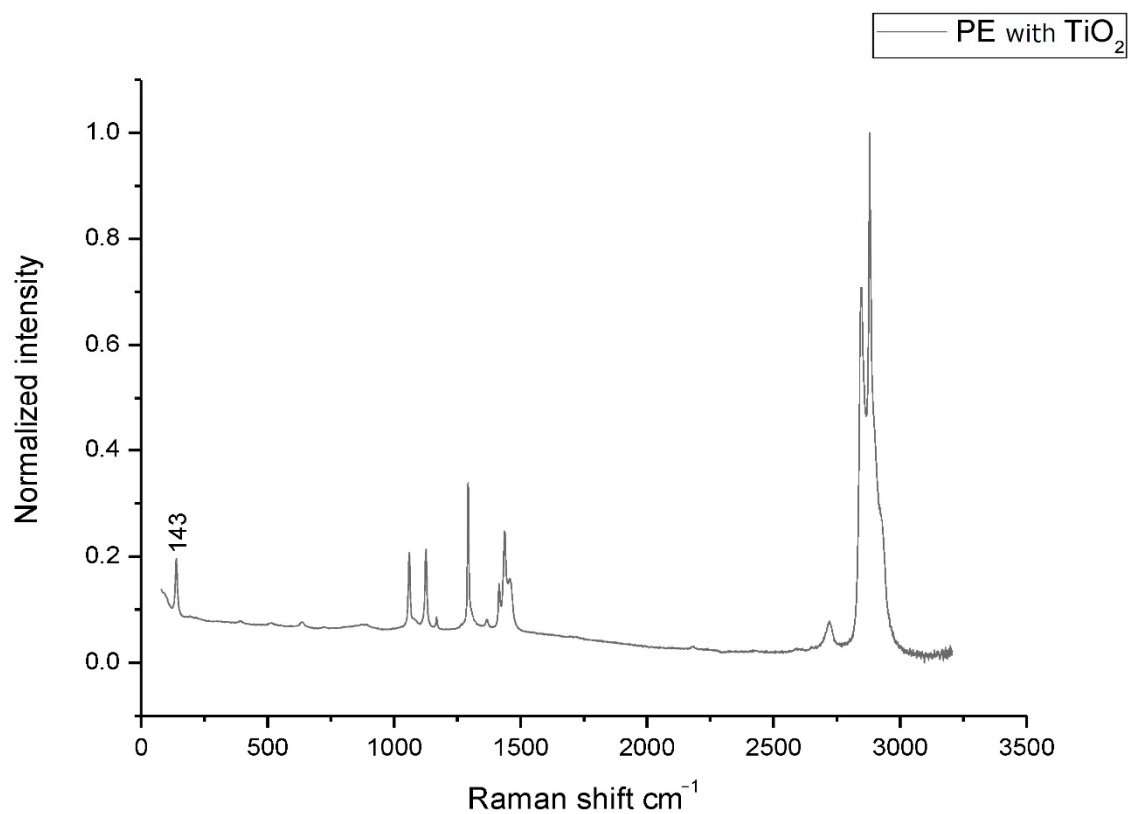

Figure S6. Raman spectrum of a fragment of Polyethylene with the characteristic peak of Titanium Oxide ( $\text{TiO}_2$ ) at 143  $\text{cm}^{-1}$ .

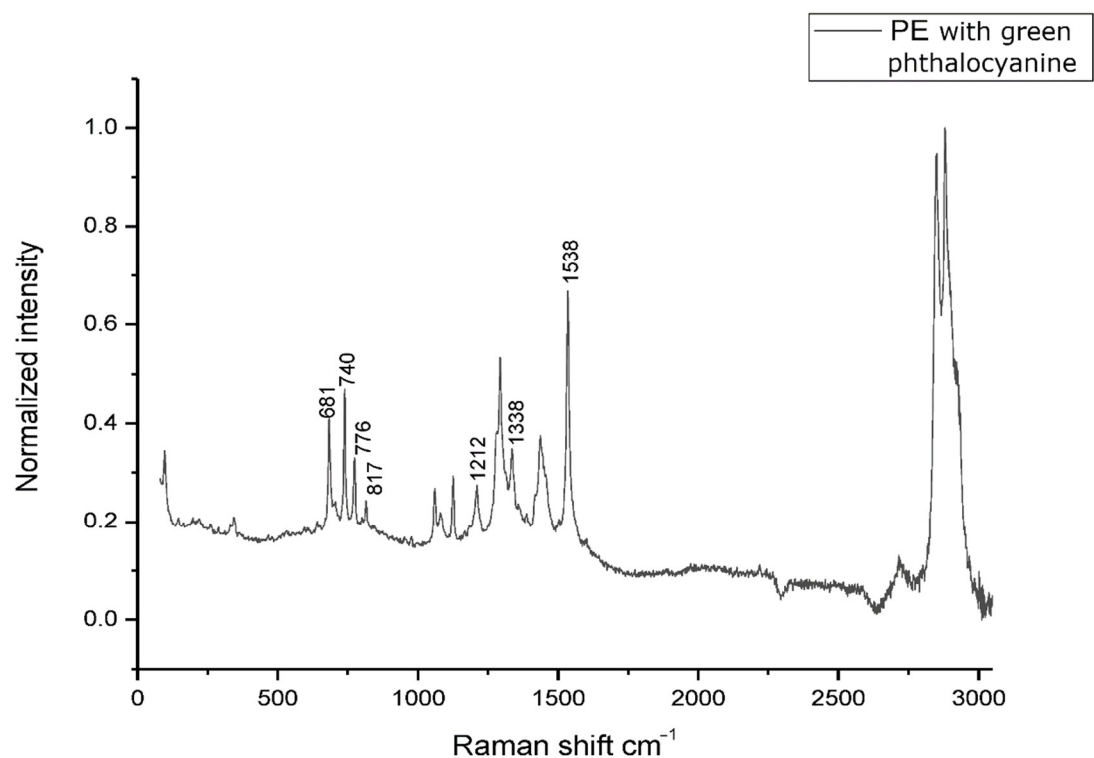

**Figure S7.** Spectrum of a fragment of Polyethylene with green pigment, green phthalocyanine  $\text{Cu}(\text{C}_{32}\text{H}_{16}\text{N}_8)$  characteristic peaks at 681  $\text{cm}^{-1}$ , 740  $\text{cm}^{-1}$ , 776  $\text{cm}^{-1}$ , 817  $\text{cm}^{-1}$ , 1212  $\text{cm}^{-1}$ , 1338  $\text{cm}^{-1}$ , 1538  $\text{cm}^{-1}$ .

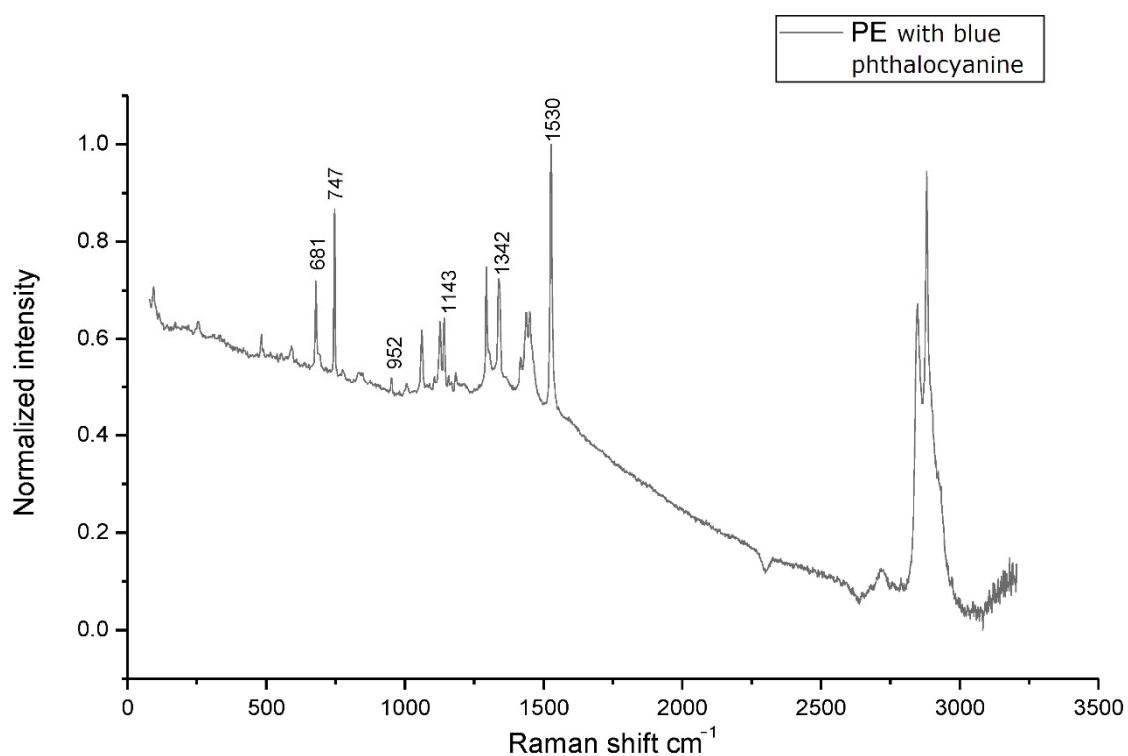

**Figure S8.** Spectrum Raman of a fragment of Polypropylene with blue phthalocyanine  $\text{Cu}(\text{C}_{32}\text{H}_{16}\text{N}_8)$ . The characteristic peaks are present at 747  $\text{cm}^{-1}$ , 952  $\text{cm}^{-1}$ , 1342  $\text{cm}^{-1}$ , 1530  $\text{cm}^{-1}$ .



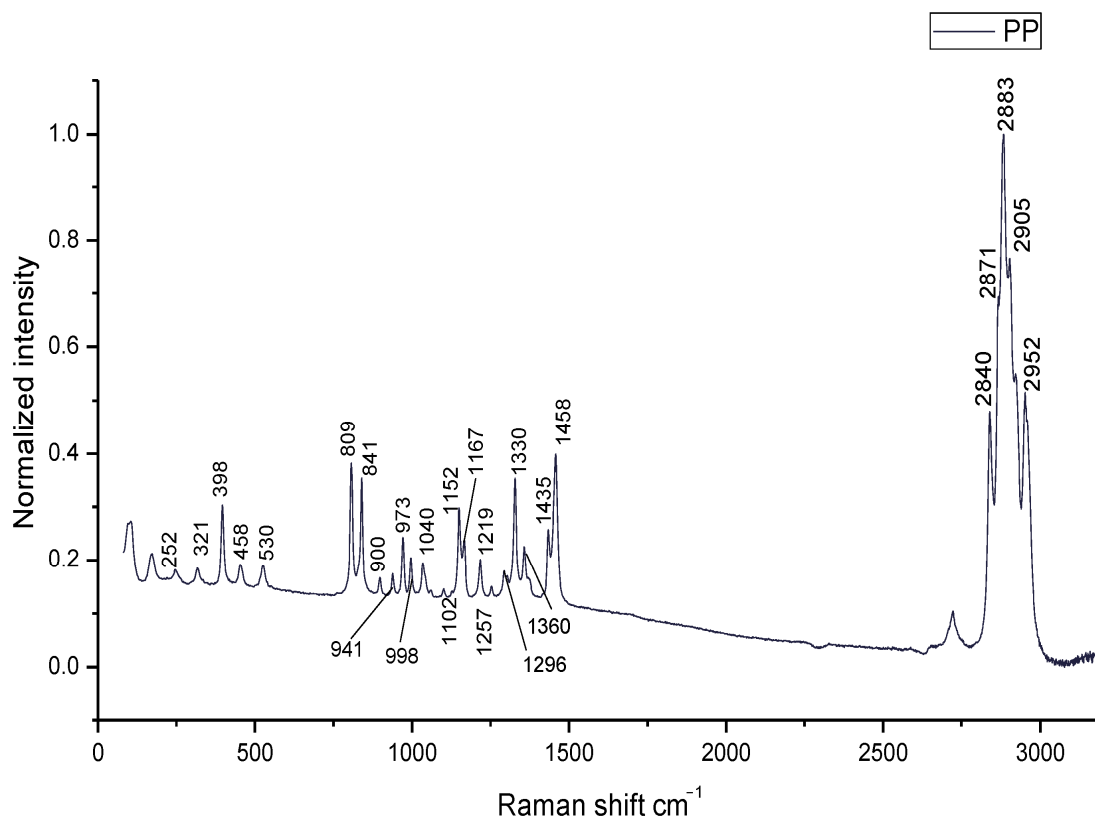

**Figure S9.** Raman spectrum of a fragment of Polypropylene.

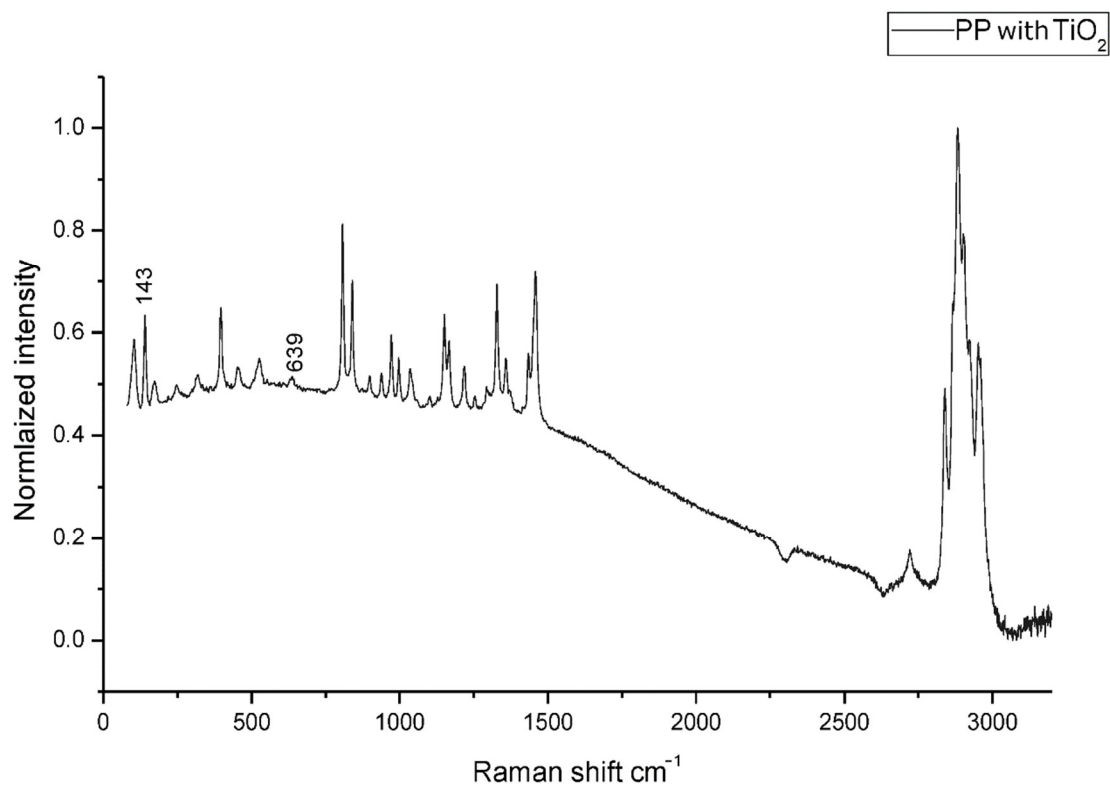

**Figure S10.** Spectrum Raman of a fragment of Polypropylene with Titanium Oxide ( $\text{TiO}_2$ ), peaks at 143  $\text{cm}^{-1}$  and 639  $\text{cm}^{-1}$ .

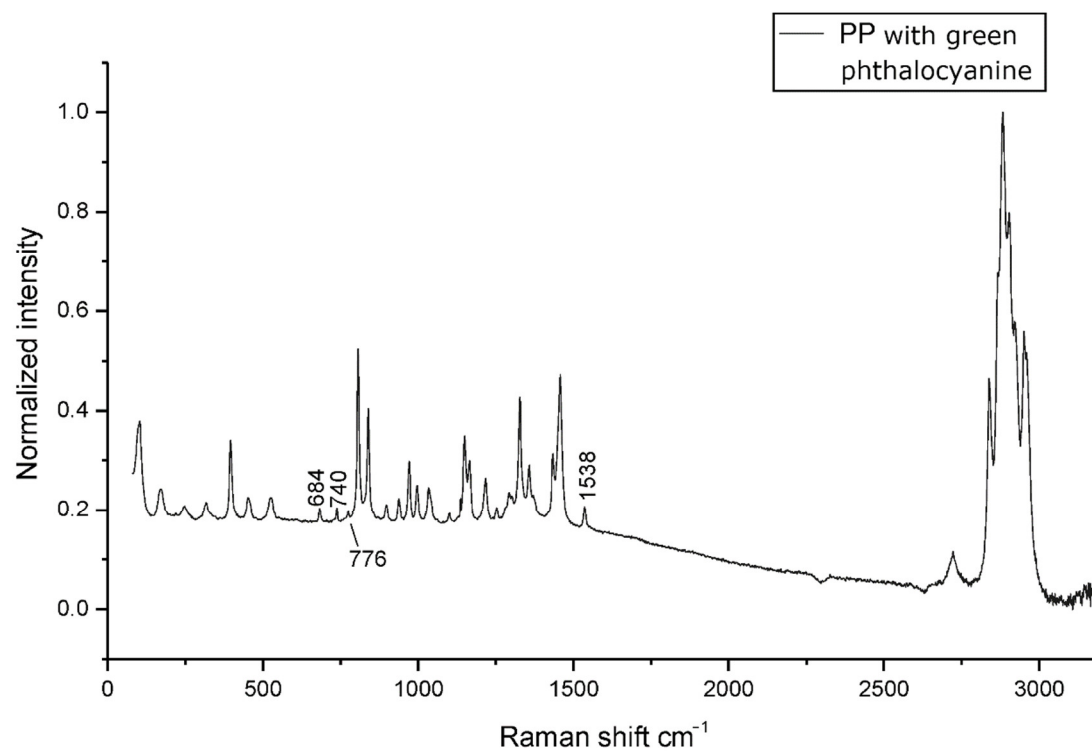

**Figure S11.** Raman spectrum of a fragment of Polypropylene with green phthalocyanine  $\text{Cu}(\text{C}_{32}\text{H}_{16}\text{N}_8)$ . The characteristic peaks are present at 1538  $\text{cm}^{-1}$ , 776  $\text{cm}^{-1}$ , 740  $\text{cm}^{-1}$ , 684  $\text{cm}^{-1}$ .

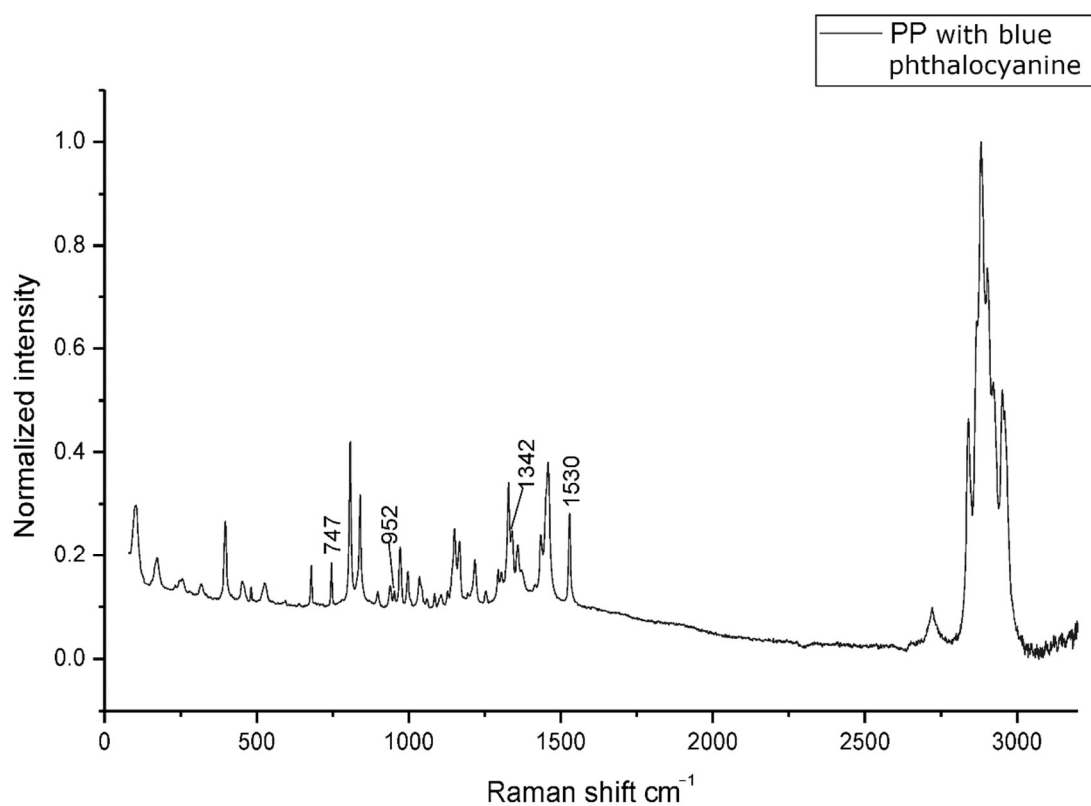

**Figure S12.** Spectrum Raman of a fragment of Polypropylene with blue phthalocyanine  $\text{Cu}(\text{C}_{32}\text{H}_{16}\text{N}_8)$ . Characteristic peaks are present at 747  $\text{cm}^{-1}$ , 952  $\text{cm}^{-1}$ , 1342  $\text{cm}^{-1}$ , 1530  $\text{cm}^{-1}$ .

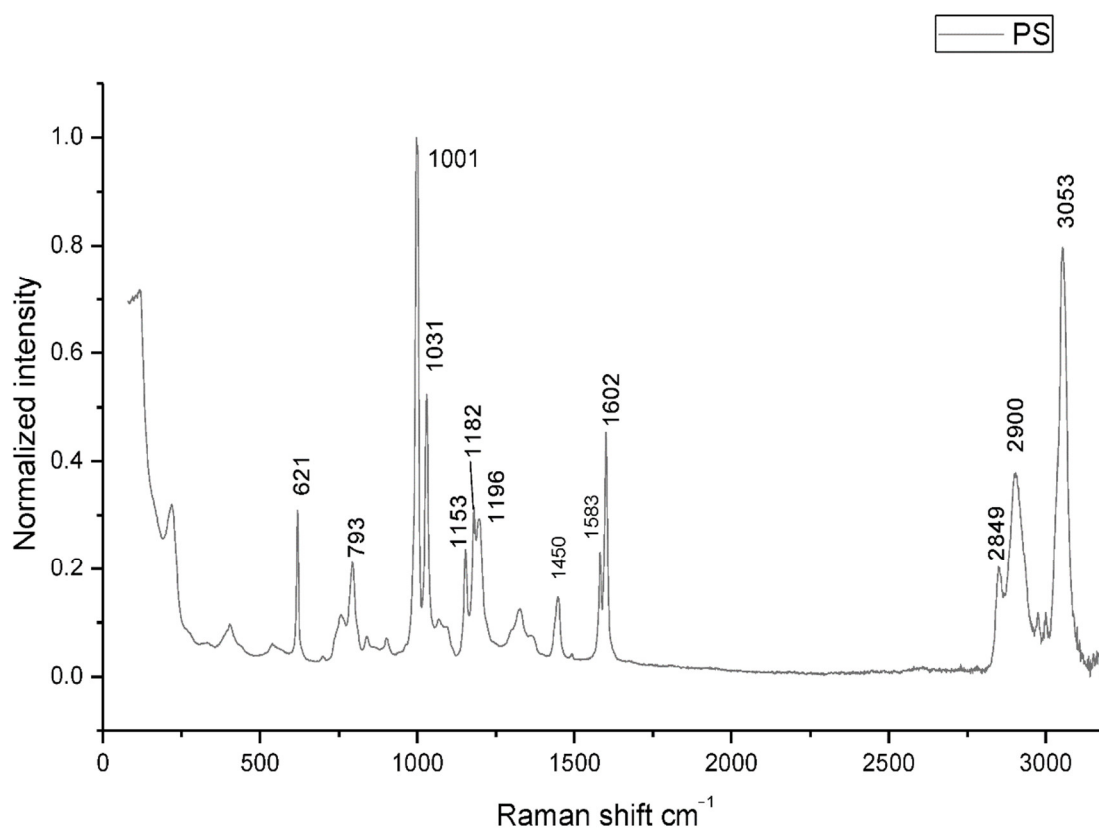

**Figure S13.** Raman Spectrum of a fragment of Polystyrene.

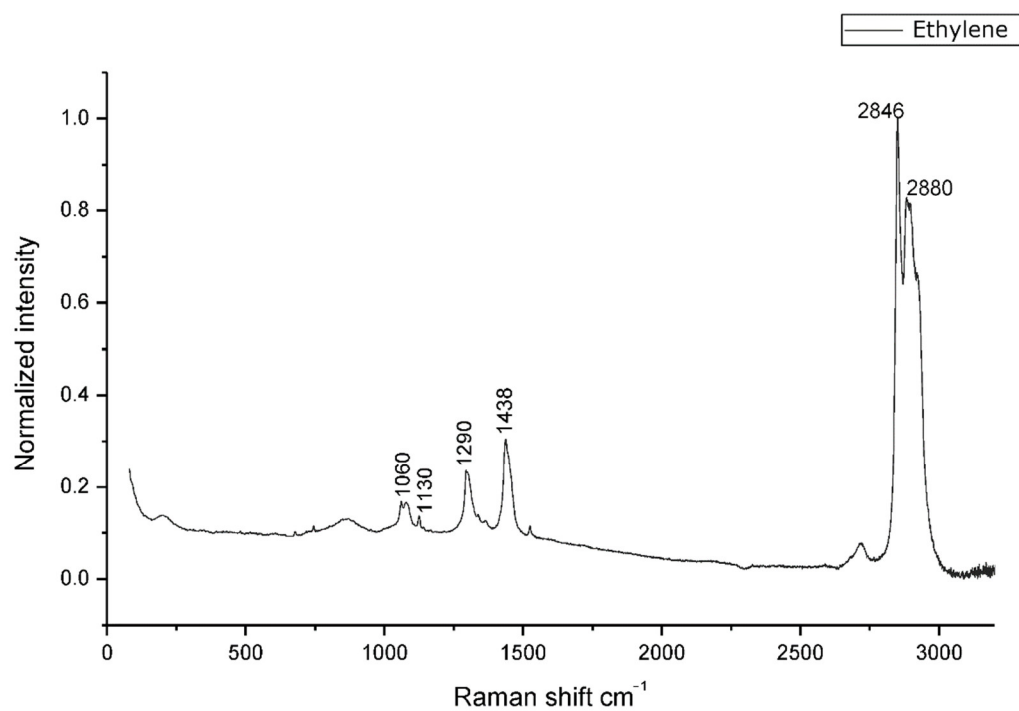

**Figure S14.** Ethylene Raman Spectrum.

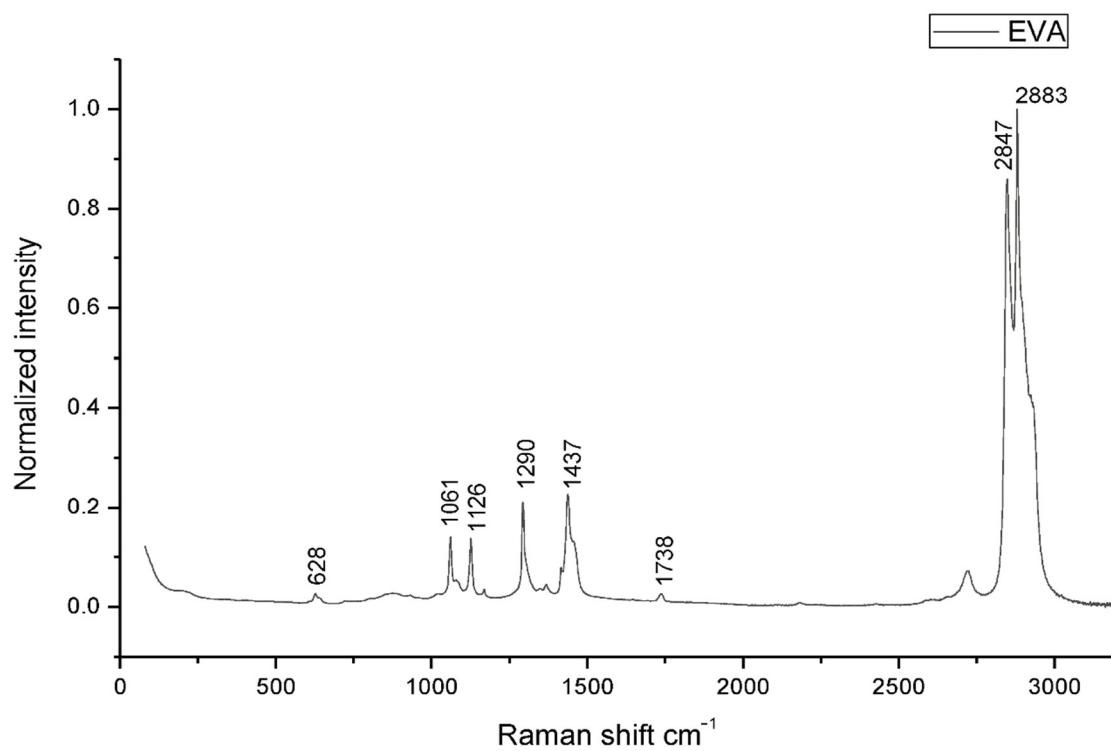

Figure S15. Raman spectrum of a fragment of ethylene vinyl acetate.

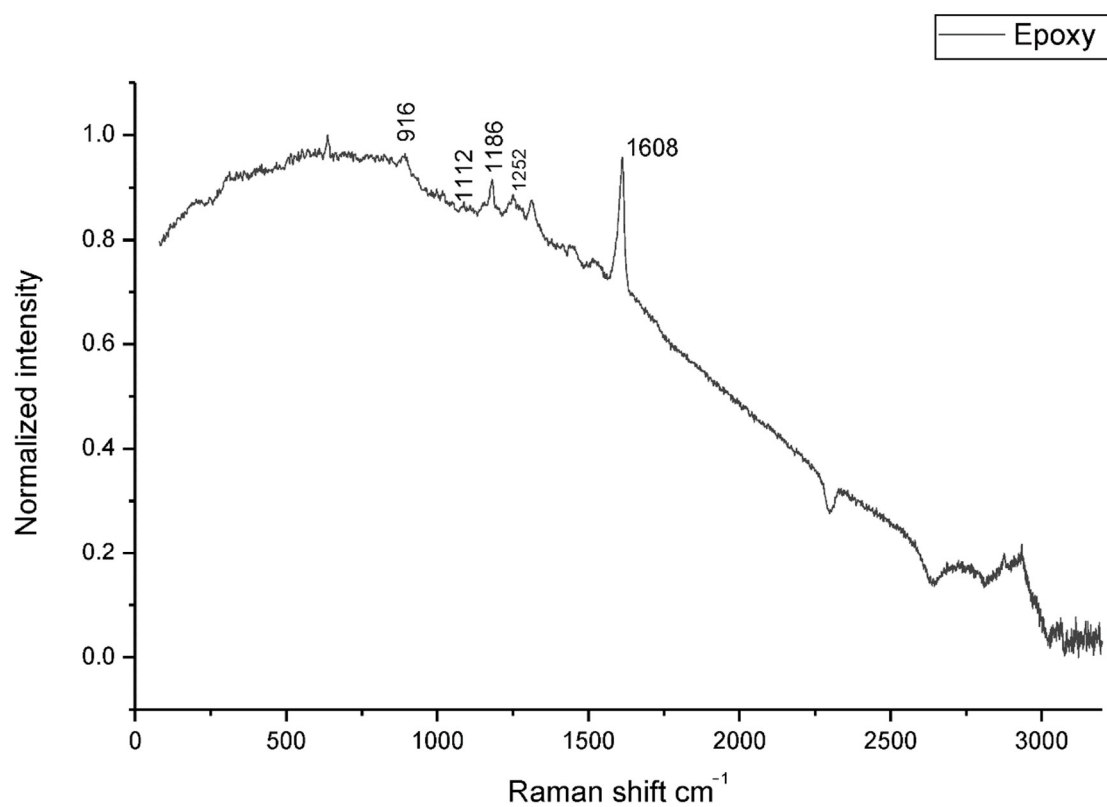

Figure S16. Raman spectrum of an epoxy resin fragment.

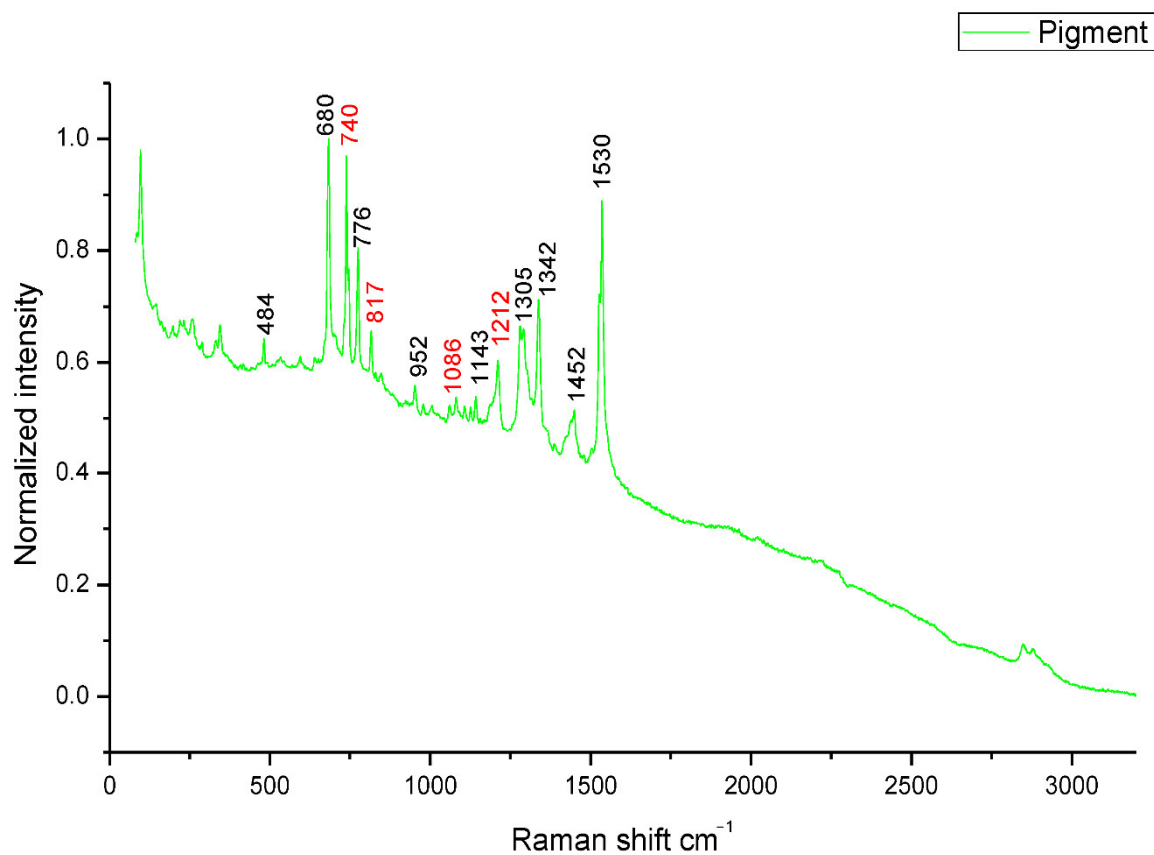

**Figure S17.** Example of a fragment classified as a pigment. In this case the spectrum has both a blue phthalocyanine (black numbers) and a green phthalocyanine (red numbers). Phthalocyanines are organic dyes that resist colour loss very well even in unfavorable environments such as at sea or on beaches under solar radiation, better than dyes of different nature, as the ones used for red and yellow pigments.
